# Supplementary material for: Using Keeper Questionnaires to Capture Zoo-Housed Tiger (Panthera tigris) Personality: Considerations for Animal Management
Source: MDPI journal article supplement (doi:10.3390/jzbg2040047), 2021-11-30
Supplement: s1 [file s1]

## S1. Tiger personality assessment survey

### Part A: about you

1. What zoological institute do you work for?
2. What is your Gender (*please circle*):  
Male  
Female  
I prefer to use my own term (please write below)  
Prefer not to say
3. How long have you worked in the industry?
4. How long have you been working with this tiger?

### Part B: about the tiger

1. Tiger's sub-species (*Please circle*):                      Sumatran                      Amur
2. Tiger's name: .....
3. Tigers sex (*Please circle*):      Male                      Female
4. Tiger's age: .....
5. Does this tiger live with company? (*Please circle*):    Yes                      No
6. If yes please specify age, sex and relation of the other individuals living with this tiger:

## Part C: Tiger personality

For the following questions please consider each of the following words and indicate to what degree it describes the tigers personality

(Please rate on a scale of 1 to 7, 1 being not at all, 7 being describes this tiger perfectly).

| Trait                | Trait definition                                                                                                                                                                                                    | Scale |   |   |   |   |   |   |
|----------------------|---------------------------------------------------------------------------------------------------------------------------------------------------------------------------------------------------------------------|-------|---|---|---|---|---|---|
| Active               | Moves frequently (e.g., paces, runs, stalks often)                                                                                                                                                                  | 1     | 2 | 3 | 4 | 5 | 6 | 7 |
| Aggressive to people | Reacts in a hostile way or attempts to attack/threaten people<br>Anxious: Interested but fearful and uneasy; vacillates between approach and withdrawal<br>Calm: Not easily disturbed by changes in the environment | 1     | 2 | 3 | 4 | 5 | 6 | 7 |
| Cooperative          | Is compliant; willingly behaves when asked to do something                                                                                                                                                          | 1     | 2 | 3 | 4 | 5 | 6 | 7 |
| Curious              | Seeks out or investigates novel situations                                                                                                                                                                          | 1     | 2 | 3 | 4 | 5 | 6 | 7 |
| Depressed            | Failure to seek out or respond to social interactions (inactive, unresponsive, asocial)                                                                                                                             | 1     | 2 | 3 | 4 | 5 | 6 | 7 |
| Eccentric            | Shows stereotypic or unusual behaviors                                                                                                                                                                              | 1     | 2 | 3 | 4 | 5 | 6 | 7 |
| Excitable            | Overreacts to changes in the environment                                                                                                                                                                            | 1     | 2 | 3 | 4 | 5 | 6 | 7 |
| Fearful of people    | Retreats readily from people                                                                                                                                                                                        | 1     | 2 | 3 | 4 | 5 | 6 | 7 |
| Friendly to people   | Initiates proximity; approaches fence readily and in a friendly manner (e.g. purrs, rubs on fence)                                                                                                                  | 1     | 2 | 3 | 4 | 5 | 6 | 7 |
| Insecure             | Seems scared easily; "jumpy" and fearful in general                                                                                                                                                                 | 1     | 2 | 3 | 4 | 5 | 6 | 7 |
| Playful              | Initiates and engages in play behavior (seemingly meaningless, but nonaggressive behavior) with objects                                                                                                             | 1     | 2 | 3 | 4 | 5 | 6 | 7 |
| Self-assured         | Moves in a seemingly confident, well-coordinated, and relaxed manner                                                                                                                                                | 1     | 2 | 3 | 4 | 5 | 6 | 7 |
| Smart                | Learns quickly to associate certain events, appears to remember for a long time                                                                                                                                     | 1     | 2 | 3 | 4 | 5 | 6 | 7 |
| Solitary             | Spends time alone; avoids company                                                                                                                                                                                   | 1     | 2 | 3 | 4 | 5 | 6 | 7 |
| Tense                | Shows restraint in movement and posture                                                                                                                                                                             | 1     | 2 | 3 | 4 | 5 | 6 | 7 |
| Timid/shy            | Reluctance to approach other animals, novel objects, or new situations                                                                                                                                              | 1     | 2 | 3 | 4 | 5 | 6 | 7 |
| Trusting             | Not suspicious; approaches easily                                                                                                                                                                                   | 1     | 2 | 3 | 4 | 5 | 6 | 7 |
| Vigilant             | Watchful, observant; spends a lot of time attending to its surroundings                                                                                                                                             | 1     | 2 | 3 | 4 | 5 | 6 | 7 |
| Vocal                | Frequently and readily vocalizes                                                                                                                                                                                    | 1     | 2 | 3 | 4 | 5 | 6 | 7 |

Do you already modify any husbandry and management protocols which are specifically adapted based on your perception of the tigers personality? If so please describe these.
